# Supplementary material for: Ontogeny of arterial macrophages defines their functions in homeostasis and inflammation
Source: PubMed Central journal article supplement (PMC7486394; doi:10.1038/s41467-020-18287-x), 2020-09-11
Supplement: 41467_2020_18287_MOESM1_ESM.pdf [file 41467_2020_18287_MOESM1_ESM.pdf]

## **Supplementary Information File**

**Ontogeny of arterial macrophages defines their functions  
in homeostasis and inflammation**

**First Author: Tobias Weinberger**

**Corresponding Author: Christian Schulz**

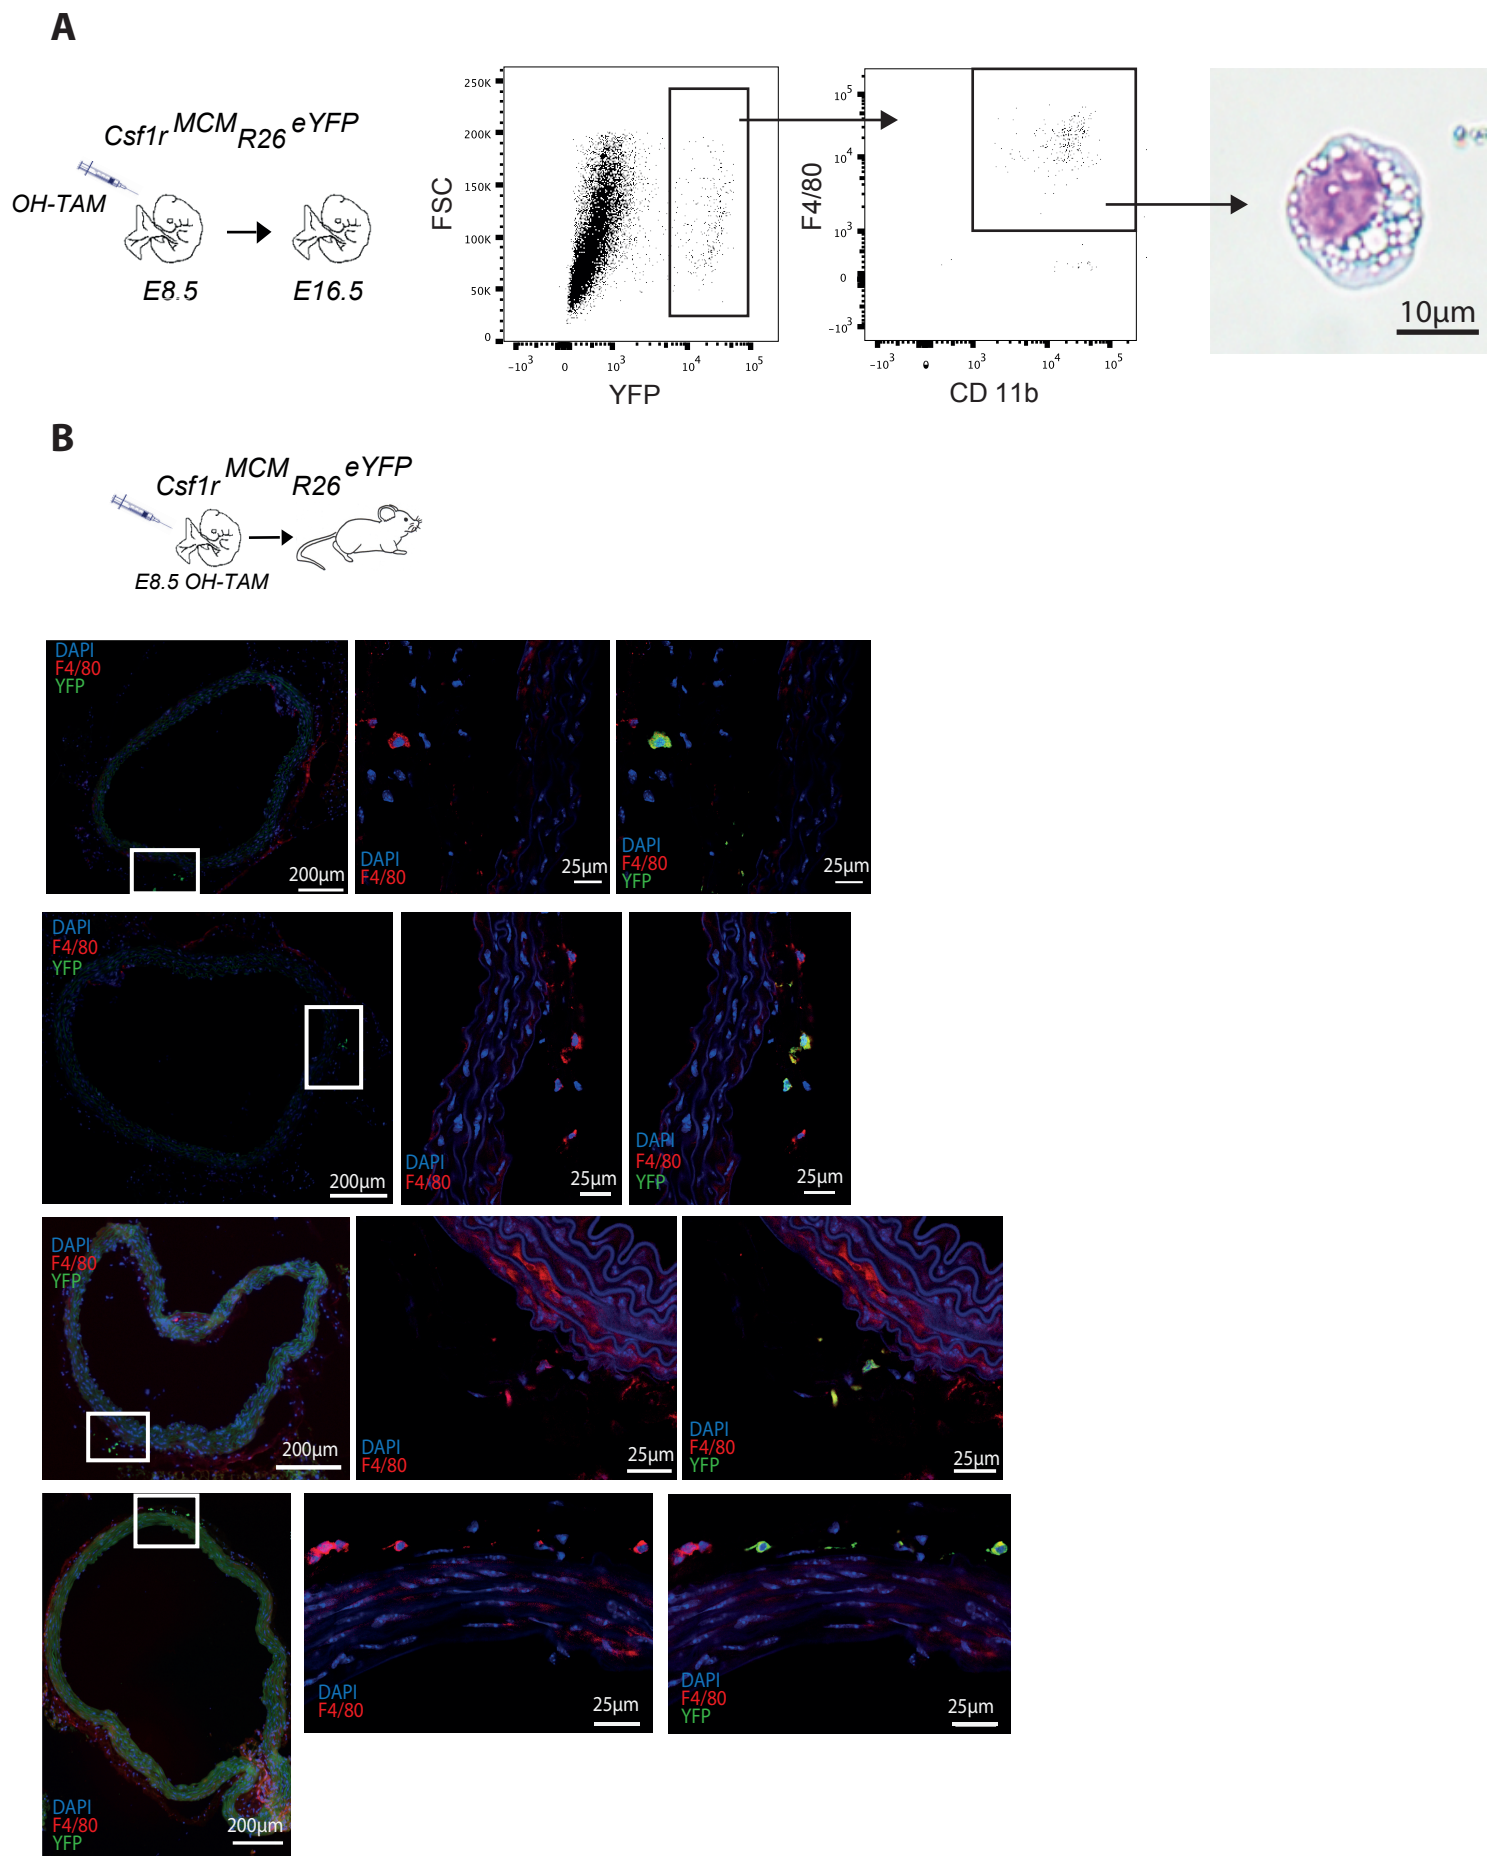

## Supplementary Figure 1

### Yolk-sac derived macrophages persist in the aorta into adulthood

(A) Exemplary FACS analysis of the aorta harvested from a E16.5 embryo after i.p. injection of hydroxytamoxifen at E8.5 into a pregnant *Csf1r<sup>MerCreMer</sup>Rosa26<sup>eYFP</sup>* mouse confirming the typical macrophage morphology after sorting, cytopspin and May-Grünwald-Giemsa staining (n=2; 2 individual experiments); (B) Exemplary immunohistological stainings from 12 month-old offspring who had received an i.p. injection of hydroxytamoxifen at E8.5 during pregnancy. Labelled macrophages were exclusively found in the adventitia. Scale bar as depicted in images.



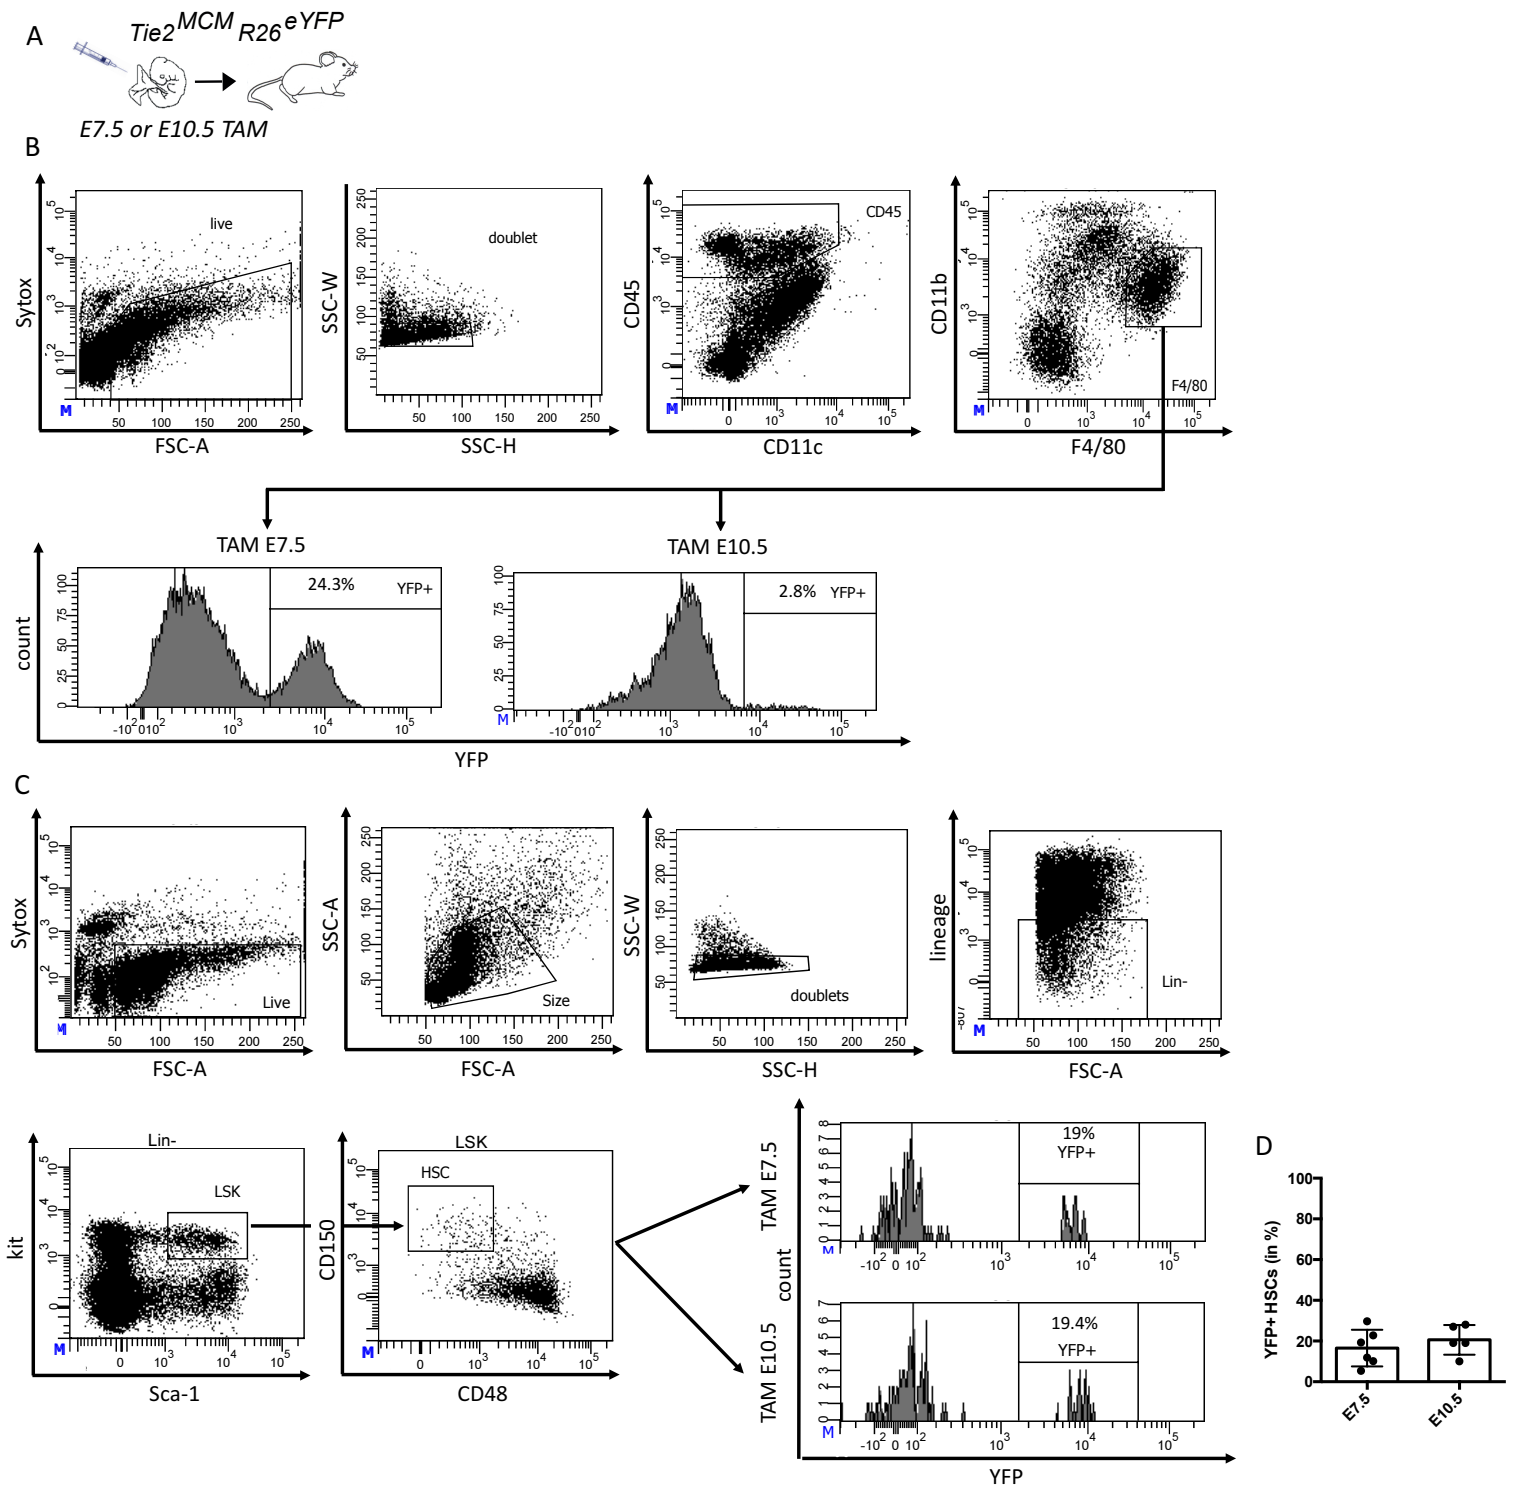

## Supplementary Figure 2

### Pulse-labelling of liver macrophages and HSCs in *Tie2<sup>MCM</sup>Rosa26<sup>eYFP</sup>* mice

(A) Schematic graph of pulse labelling in pregnant *Tie2<sup>MCM</sup>Rosa26<sup>eYFP</sup>* mice by oral application of tamoxifen (E7.5 or E10.5), (B) gating strategy to identify liver macrophages (live/singlets/CD45<sup>+</sup>/CD11c<sup>-</sup>/CD11b<sup>lo</sup>/F4/80<sup>hi</sup>) and their expression of YFP, (C) gating strategy of HSCs (live/singlets/lin<sup>-</sup>(CD11b<sup>-</sup>/CD19<sup>-</sup>/CD3e<sup>-</sup>/CD4<sup>-</sup>/CD8a<sup>-</sup>/Gr-1<sup>-</sup>/Ter119<sup>-</sup>)/kit<sup>+</sup>/Sca-1<sup>+</sup>/CD150<sup>+</sup>/CD48<sup>-</sup>) and their expression of YFP, (D) percentage of YFP<sup>+</sup> HSCs in 3 month old mice injected at E7.5 and E10.5 (n=6 for E7.5 and n=5 for E10.5; 2 independent experiments at each time-point). Mean ± SD is shown.

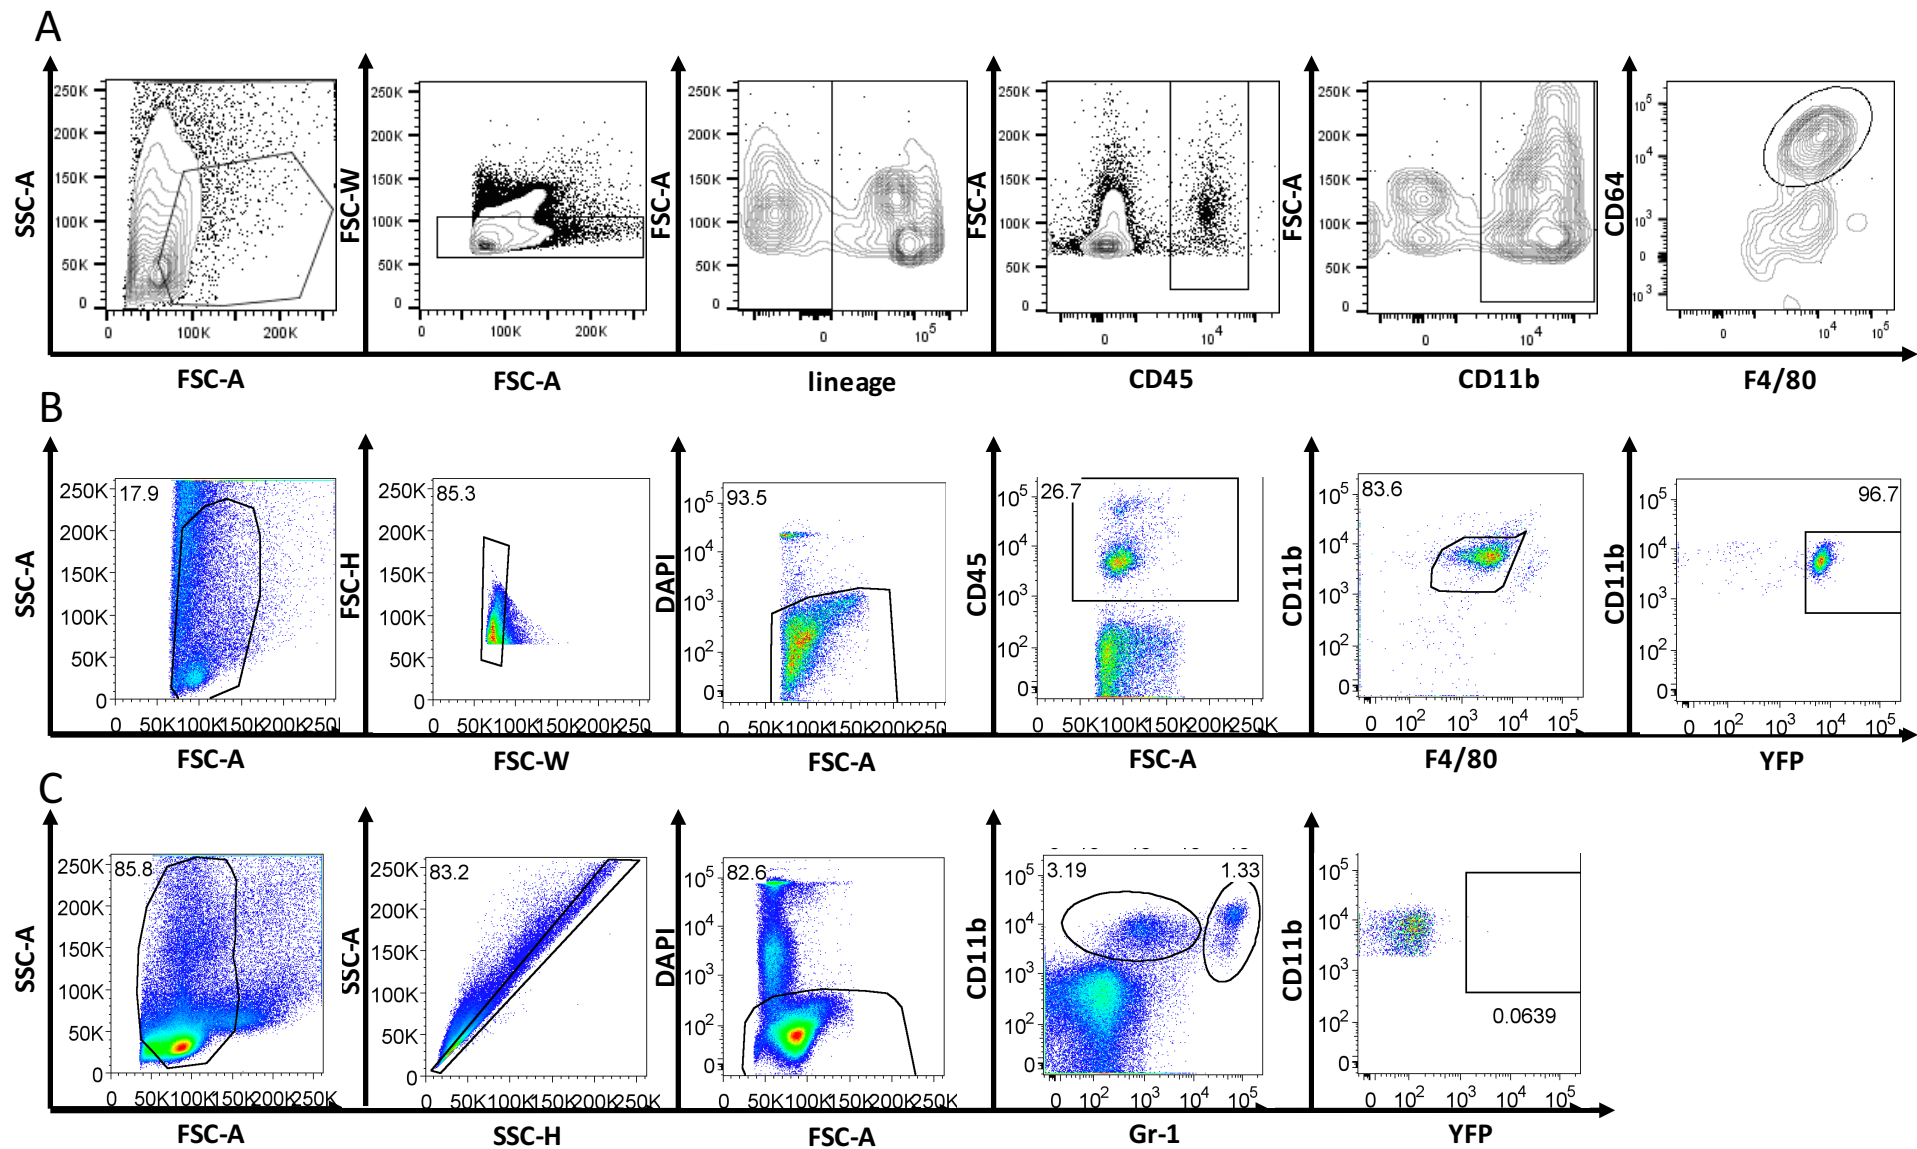

**Supplementary Figure 3**

**Gating strategy of adventitial macrophages, microglia and blood monocytes**

(A) Gating strategy of adventitial macrophages (single CD45+, lin-(CD11c, SiglecF, Ter119, Ly6g), CD11b+, F4/80+ cells) (B) gating strategy of microglia (live/singlets/ CD45+/CD11b+/F4/80+) and (C) gating strategy of blood monocytes (live/singlets/CD11b<sup>hi</sup>, Gr-1<sup>lo</sup>)

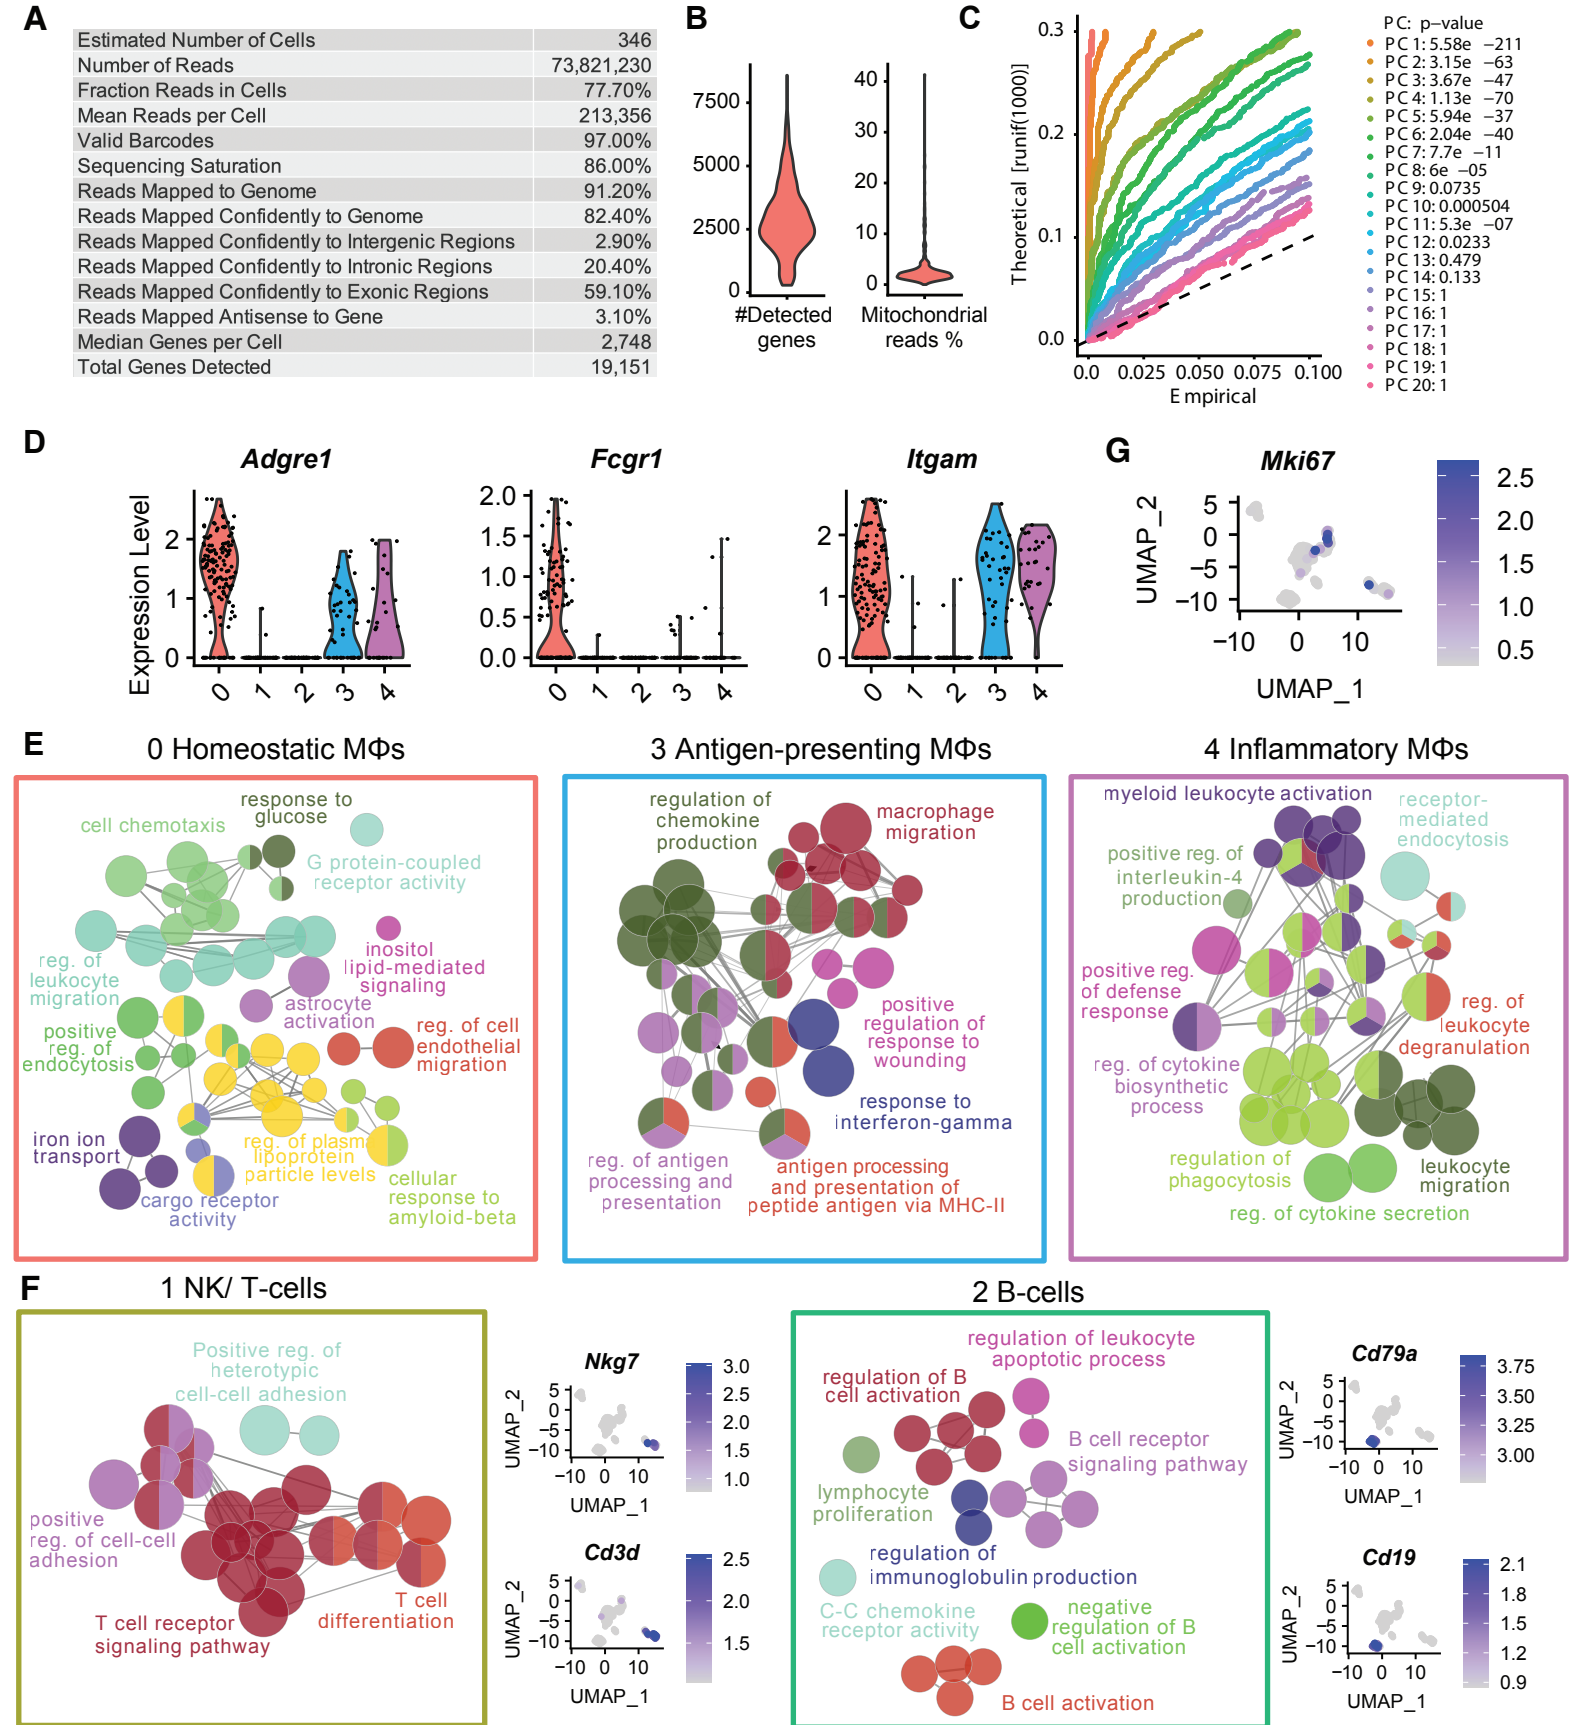

**Supplementary Figure 4**

**Single cell analysis of CD45+ immune cells in *Rank<sup>Cre</sup>Rosa26<sup>eYFP</sup>* mice in steady state**

(A) Sequencing data quality metrics of steady state adventitial sample. (B) Violin plots depicting distribution of detected genes and percentage of mitochondrial read content used for preprocessing in Seurat. (C) JackStraw analysis of principle components. PCs 1 to 12 were used for downstream analysis. (D) Violin plots showing the expression of general macrophage markers *Adgre1* (F4/80), *Fcgr1* (Cd64) and *Itgam* (CD11b). (E) Expression of *Mki67* as a marker of proliferative cells. Proliferation is mainly limited to cluster 3. (F-G) GO Biological processes (P-value<0.05, GO tree levels 3 to 8) associated with different macrophage populations (F) and other leukocyte cluster (G) and feature plots depicting representative marker genes of each cluster. ClueGo performs the enrichment test based on the hypergeometric distribution and Bonferroni correction

### *Yfp+* vs *Yfp-* SS Cluster 0

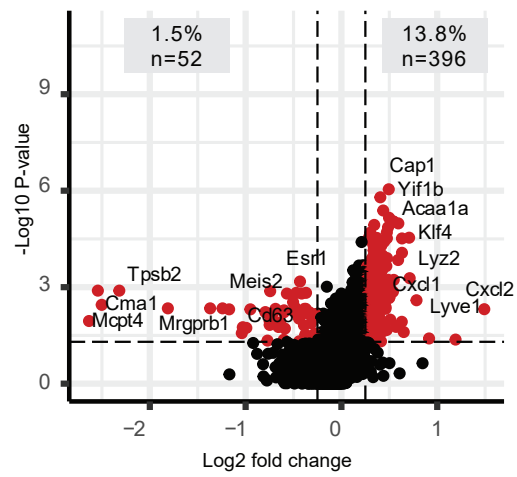

### Supplementary Figure 5

#### Differential gene expression of *Yfp+* and *Yfp-* macrophages in Cluster 0 at steady state

Volcano plot shows statistical significance (P value) versus magnitude of change (fold change) of genes expressed by *Yfp+* and *Yfp-* macrophages in cluster 0. Differentially expressed genes ( $p < 0.05$ ) based on Wilcoxon Rank Sum test are indicated in red and their percentage and absolute number is given.

A

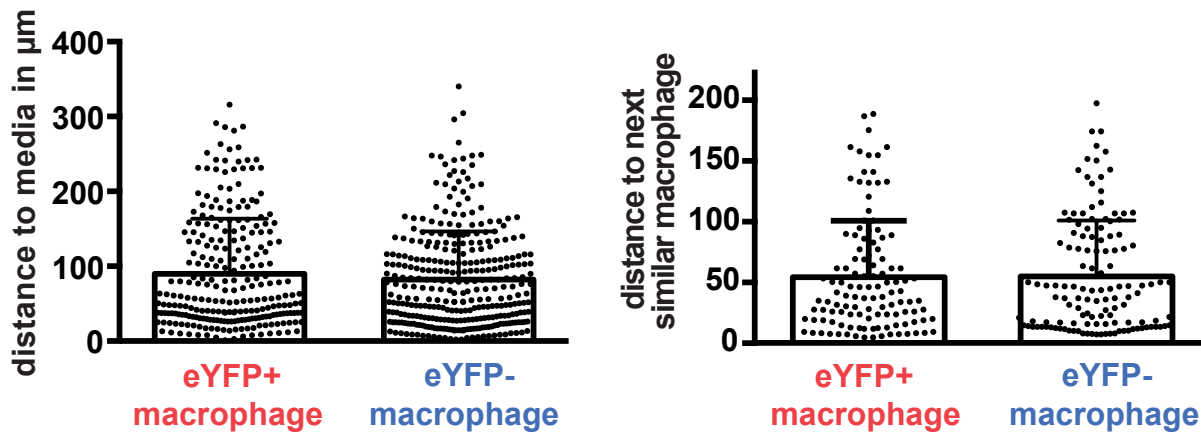

B

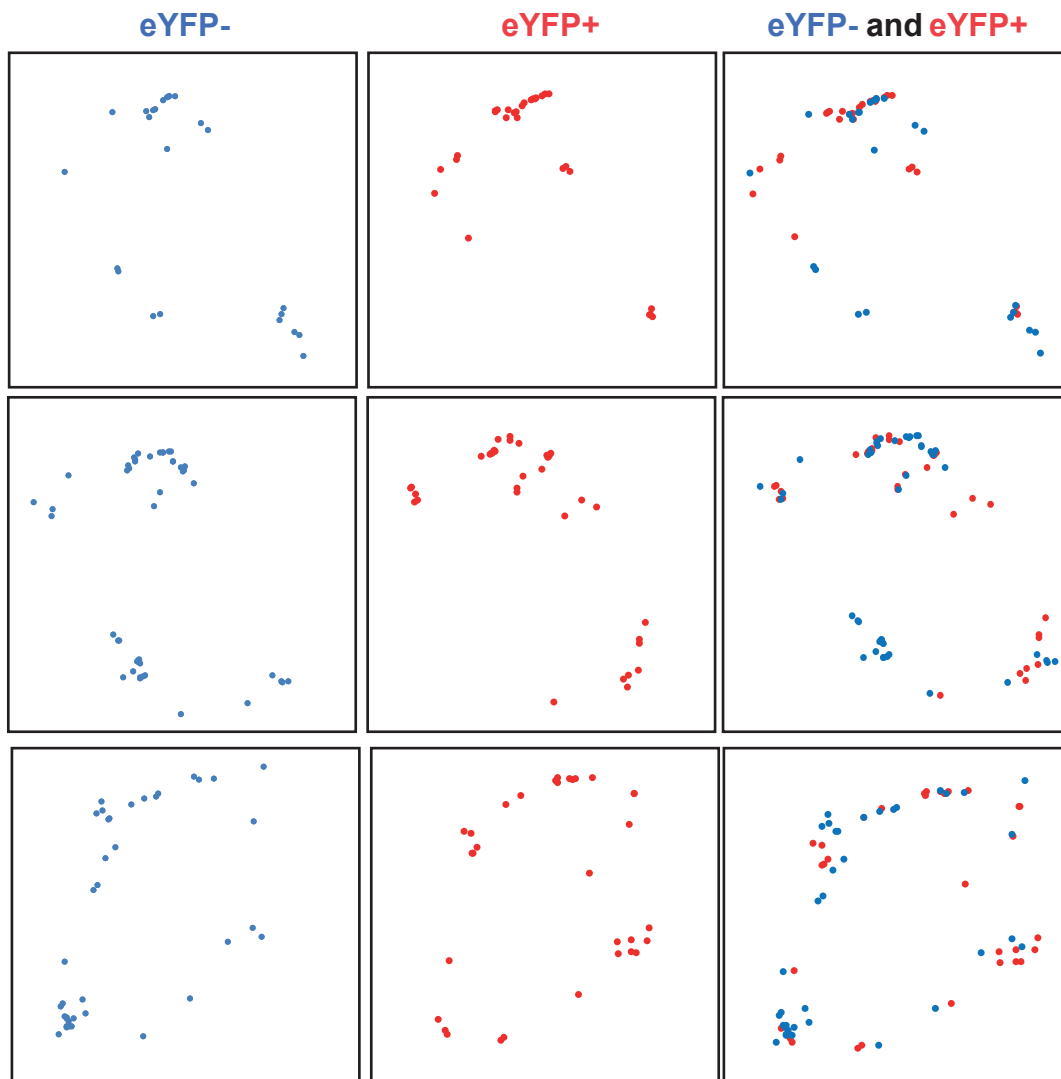

### Supplementary Figure 6

#### Stochastic distribution of adventitial eYFP+ and eYFP- macrophages in *Flt3<sup>Cre</sup>Rosa26<sup>eYFP</sup>* mice

(A) Analysis of the macrophage-media distance ( $n = 330$  for eYFP- macrophages,  $n = 251$  for eYFP+ macrophages) as well as the distance to the next macrophage of equal YFP expression ( $n = 160$  for eYFP- macrophages,  $n = 137$  for eYFP+ macrophages) in aortas of *Flt3<sup>Cre</sup>Rosa26<sup>eYFP</sup>* mice ( $n = 3$ , 3 individual experiments) and (B) their distribution throughout the aorta.

A

| N° of analysed macrophages | Percentage of YFP+ macrophages |
|----------------------------|--------------------------------|
| 4.380                      | 45,2%                          |
| 2.811                      | 44,4%                          |
| 2.221                      | 51,8%                          |
| 1.653                      | 52,4%                          |

B

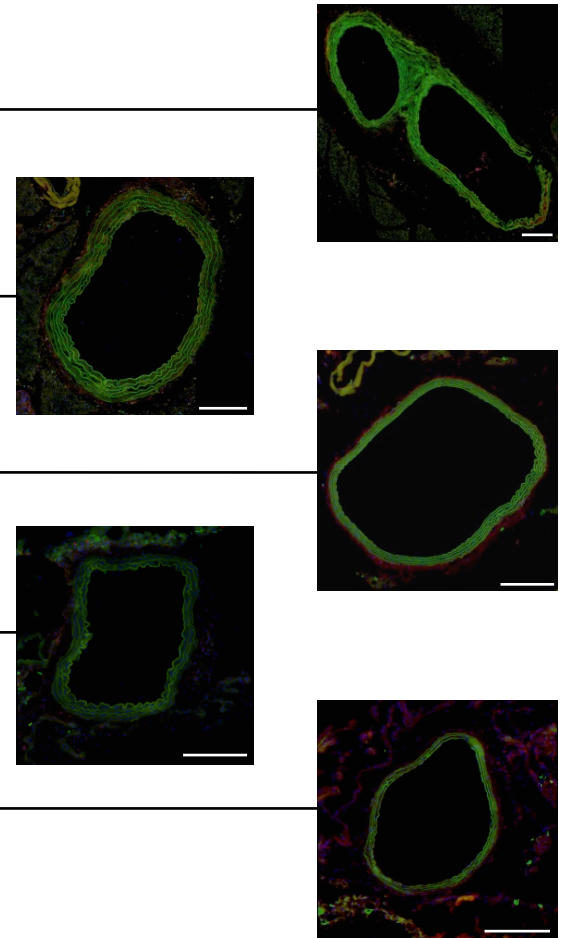

### Supplementary Figure 7

#### Equal distribution of macrophages in different anatomic regions of the aorta in *Flt3<sup>Cre</sup>Rosa26<sup>eYFP</sup>* mice

(A) Analysis of 11.065 adventitial macrophages (n=14) in different regions the aorta of *Flt3<sup>Cre</sup>Rosa26<sup>eYFP</sup>* mice and percentage of YFP-expression in the defined regions. Scale bar represents 200µm.

**A**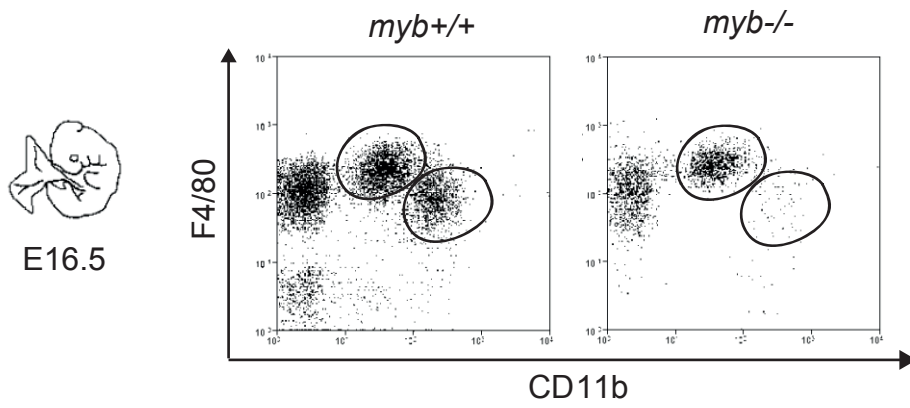**B**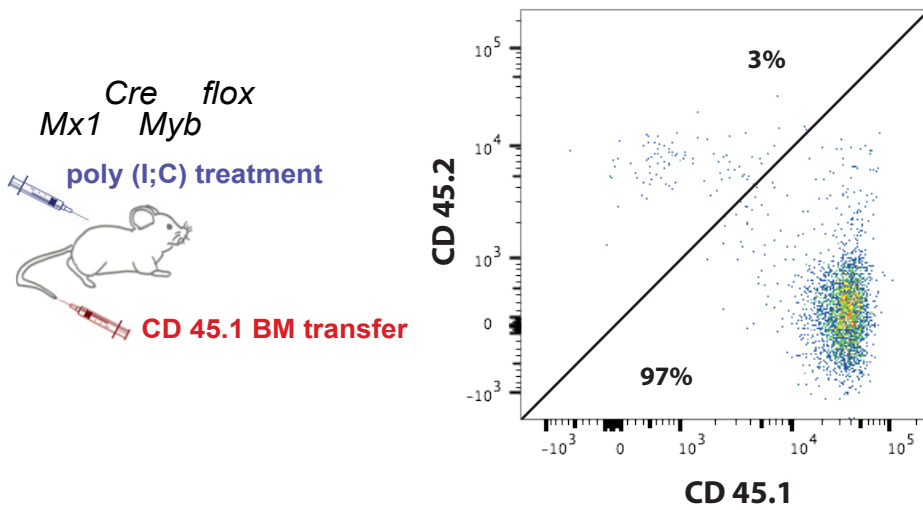**Supplementary Figure 8****Genetic BM-ablation model to generate CD45.1/2 BM-chimeras**

(A) Flow cytometry of aortas harvested from *Myb*<sup>+/+</sup> and *Myb*<sup>-/-</sup> mice on E16.5 showing a *myb*-independent F4/80<sup>hi</sup> macrophage population. (B) exemplary flow cytometry showing the expression of CD45.1 and CD45.2 in CD115<sup>+</sup> blood monocytes 1 month after BM-transplantation of CD45.1 BM into CD45.2 *Mx1*<sup>Cre</sup>*Myb*<sup>fl/fl</sup> mice.



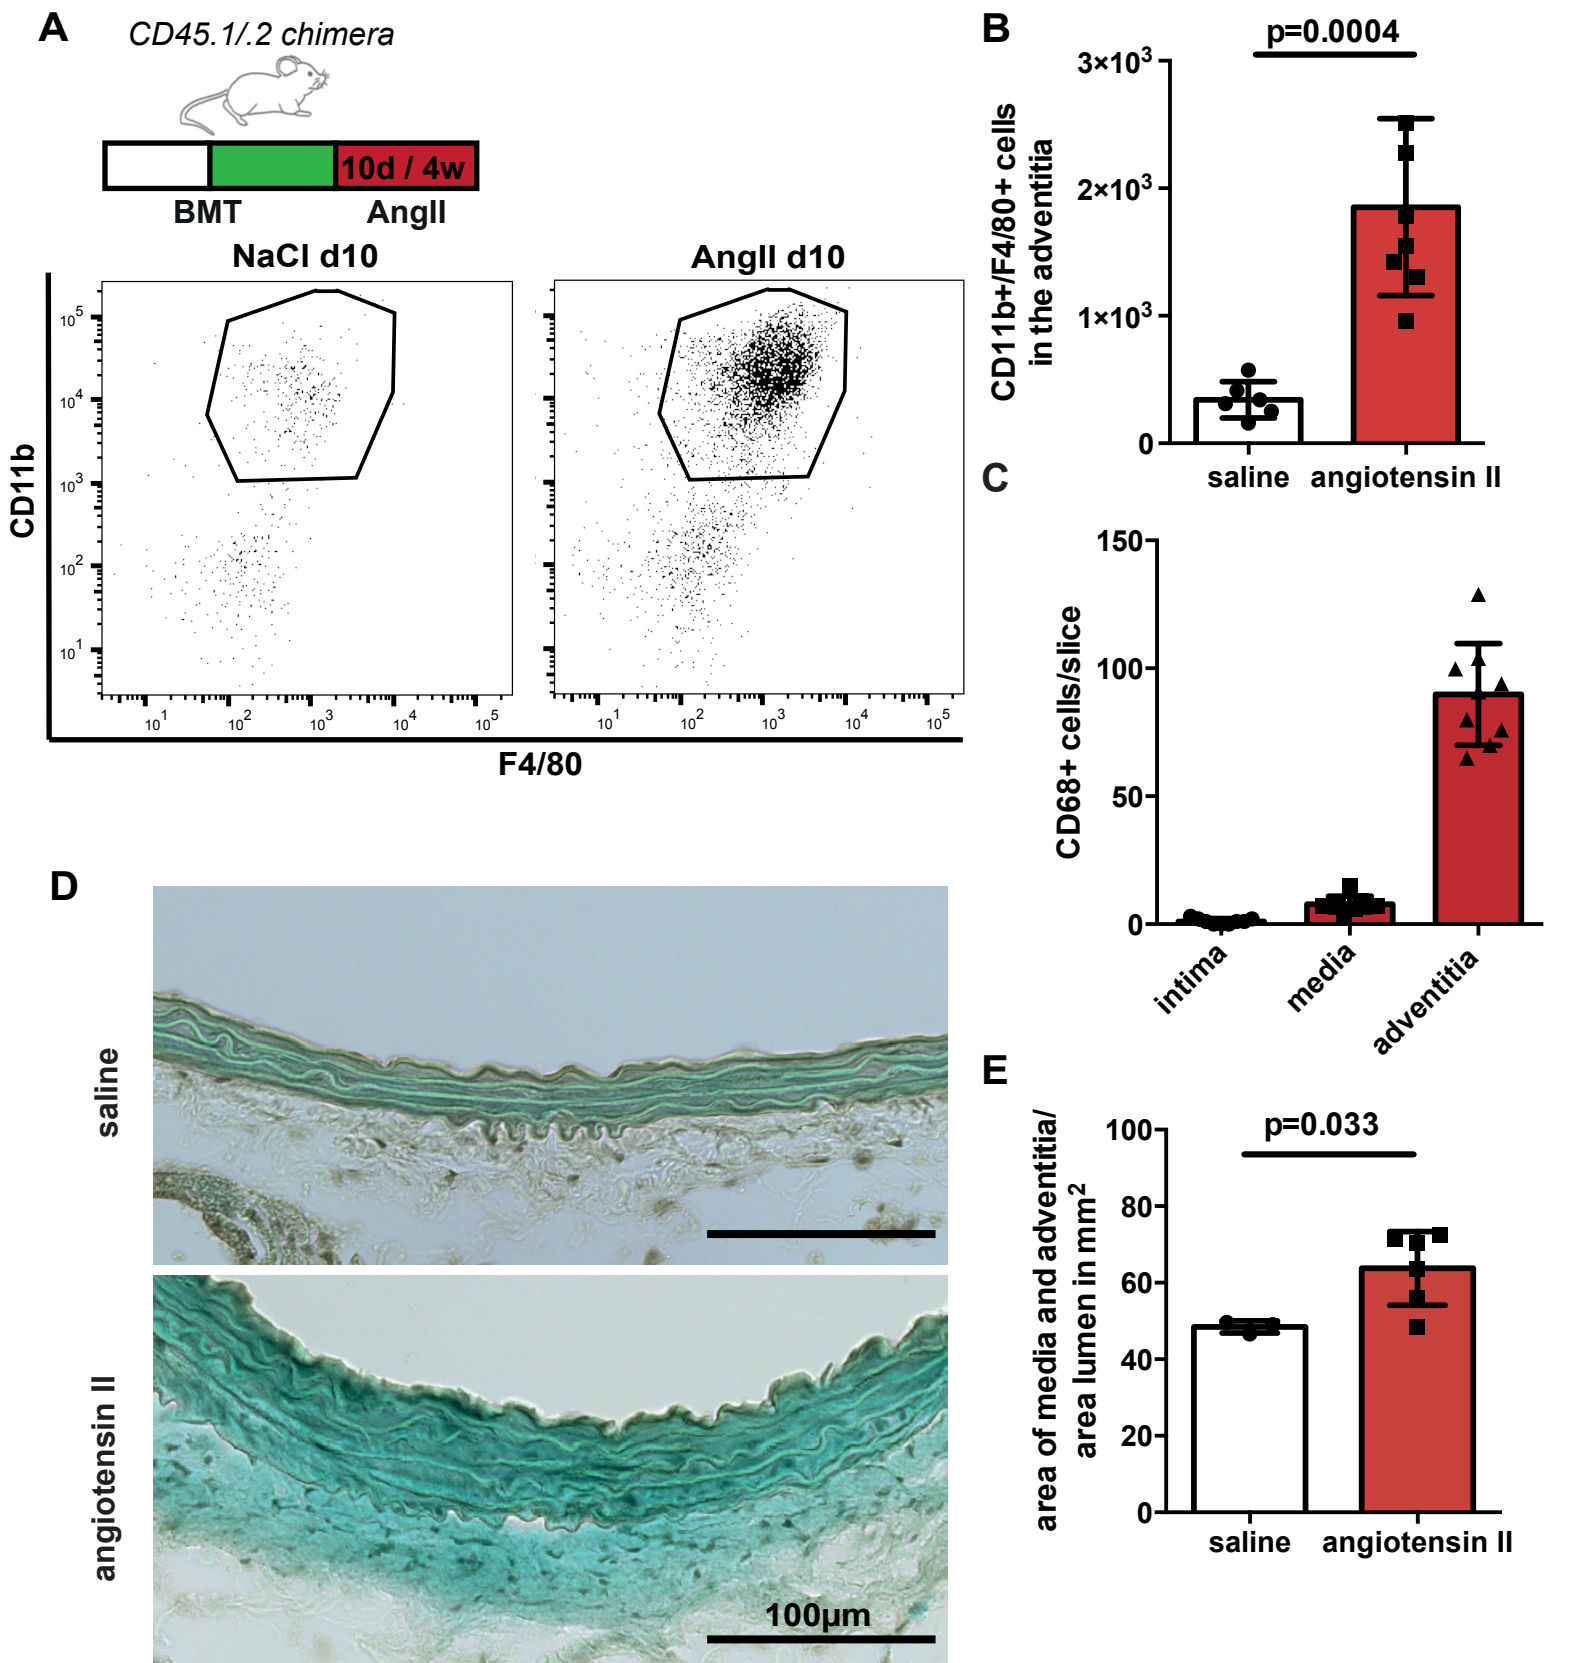

**Supplementary Figure 9**

**Angiotensin II treatment induces arterial inflammation and vascular fibrosis**

(A) Representative flow cytometry of single  $CD45^{+}/lin^{-}/CD11b^{+}/F4/80^{+}$  macrophages in the adventitia after 10 days of angiotensin II infusion and (B) quantification of macrophages in saline as well as angiotensin II treated mice ( $n=6$  for saline and  $n=7$  for AngII; each 3 independent experiments). (C) Histological quantification of macrophages (CD68+ cells) in different anatomical regions ( $n=3$ , 3 slices per animal are shown, 3 independent experiments). (D) Exemplary masson-trichrome staining of aortas of mice treated with saline or angiotensin II (28 days) and (E) quantification of the fibrotic tissue in the adventitia and media in masson-trichrome stainings ( $n=3$  for saline and  $n=6$  for AngII; each 2 independent experiments). Two-sided tests were performed. Mean  $\pm$  SD is shown.

**A**

|                                                |             |
|------------------------------------------------|-------------|
| Estimated Number of Cells                      | 4,419       |
| Number of Reads                                | 192,371,279 |
| Fraction Reads in Cells                        | 78.90%      |
| Mean Reads per Cell                            | 43,533      |
| Valid Barcodes                                 | 97.80%      |
| Sequencing Saturation                          | 76.20%      |
| Reads Mapped to Genome                         | 92.50%      |
| Reads Mapped Confidently to Genome             | 83.60%      |
| Reads Mapped Confidently to Intergenic Regions | 2.30%       |
| Reads Mapped Confidently to Intronic Regions   | 18.20%      |
| Reads Mapped Confidently to Exonic Regions     | 63.10%      |
| Reads Mapped Antisense to Gene                 | 2.40%       |
| Median Genes per Cell                          | 687         |
| Total Genes Detected                           | 22,612      |

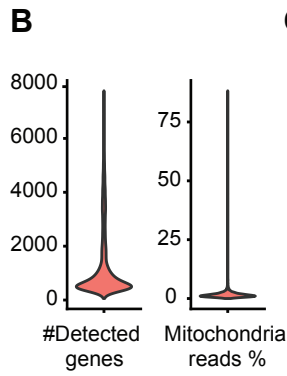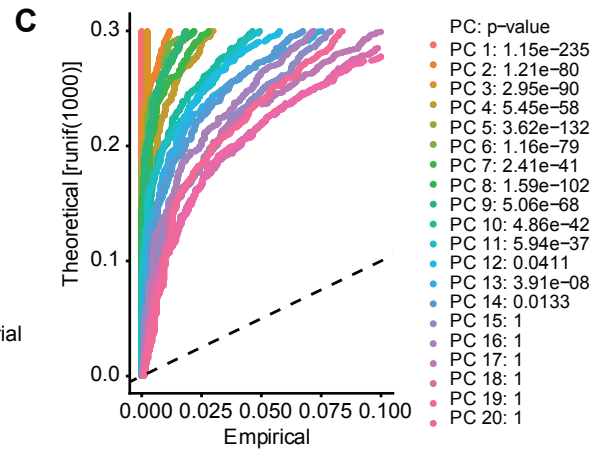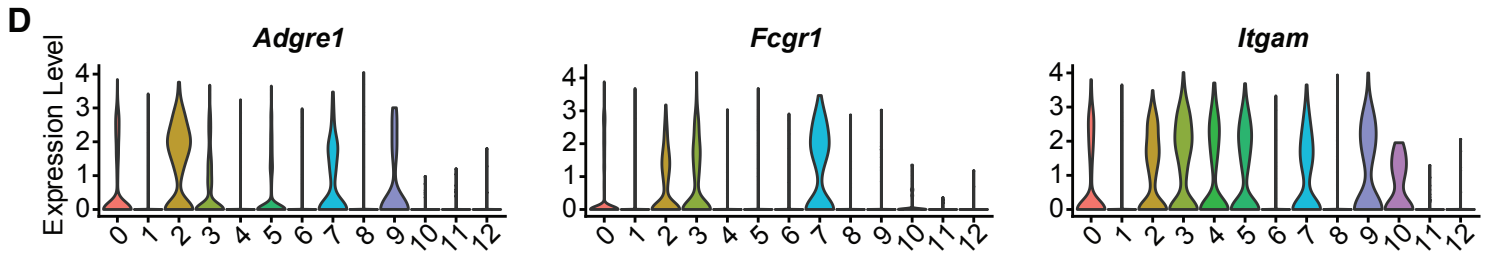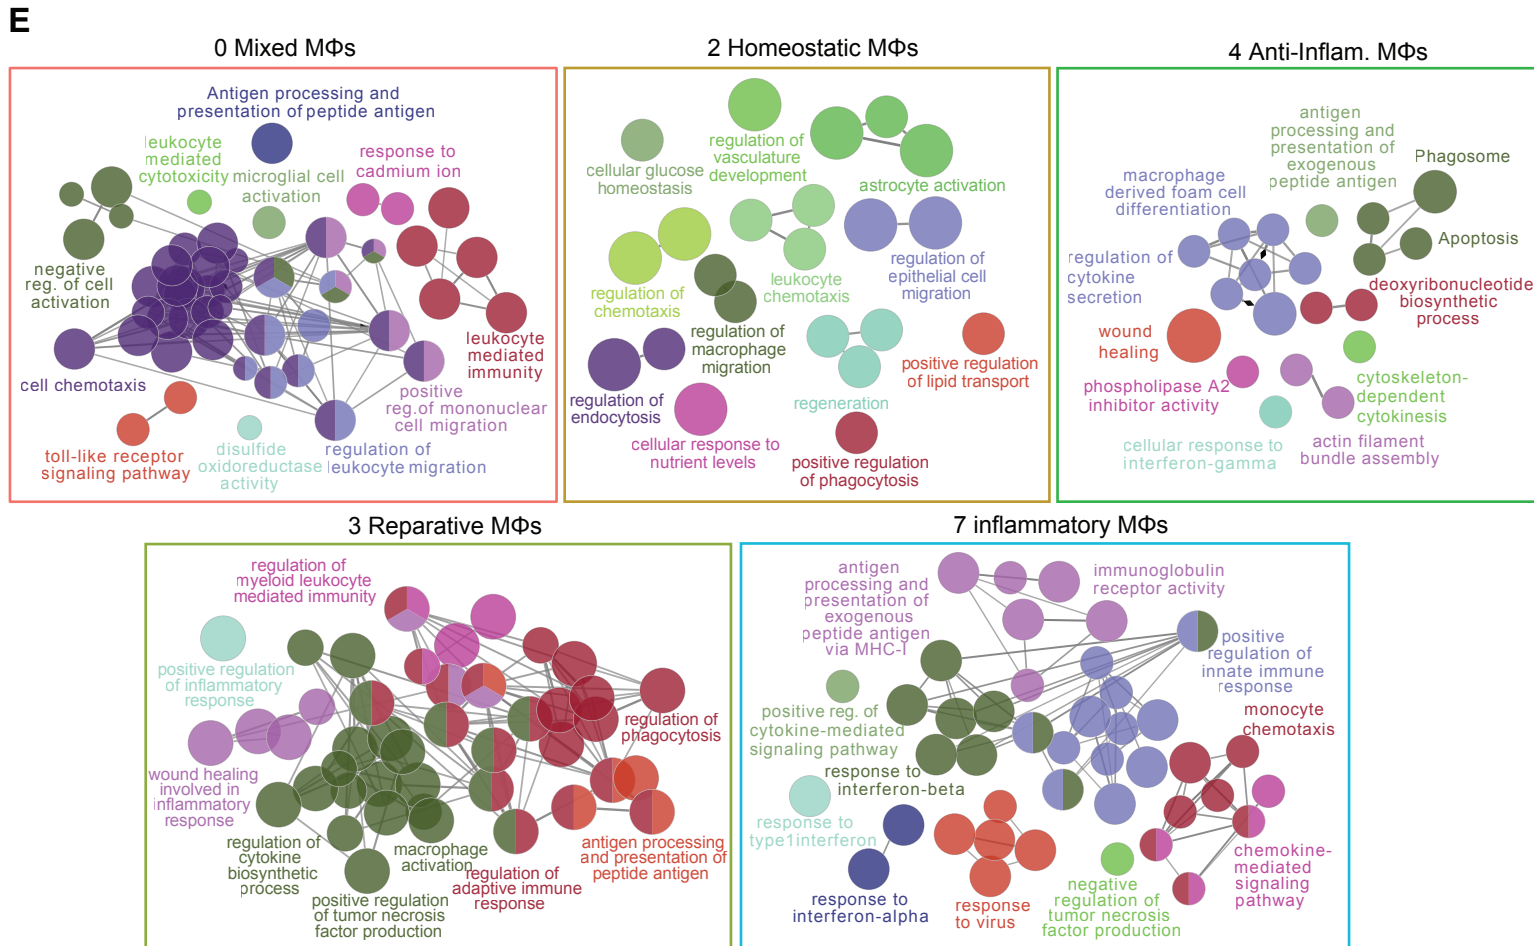

**Supplementary Figure 10**

**Single cell analysis of CD45+ immune cells in *Rank<sup>Cre</sup>Rosa26<sup>eYFP</sup>* mice in AngII-induced inflammation**

(A) Sequencing data quality metrics of CD45+ cells from adventitia of angiotensin II treated mice. (B) Violin plots depicting distribution of detected genes and percentage of mitochondrial read content used for preprocessing in Seurat. (C) JackStraw analysis of principle components. PCs 1 to 14 were used for downstream analysis. (D) Violin plots showing the expression of general macrophage markers *Adgre1* (F4/80), *Fcgr1* (Cd64) and *Itgam* (CD11b) through different leukocyte clusters. (E) GO Biological processes (P-value<0.05, GO tree levels 3 to 8) associated with different macrophage populations calculated using ClueGO. The markers in all panels were identified using the Wilcoxon Rank Sum test. ClueGo performs the enrichment test based on the hypergeometric distribution and Bonferroni correction.

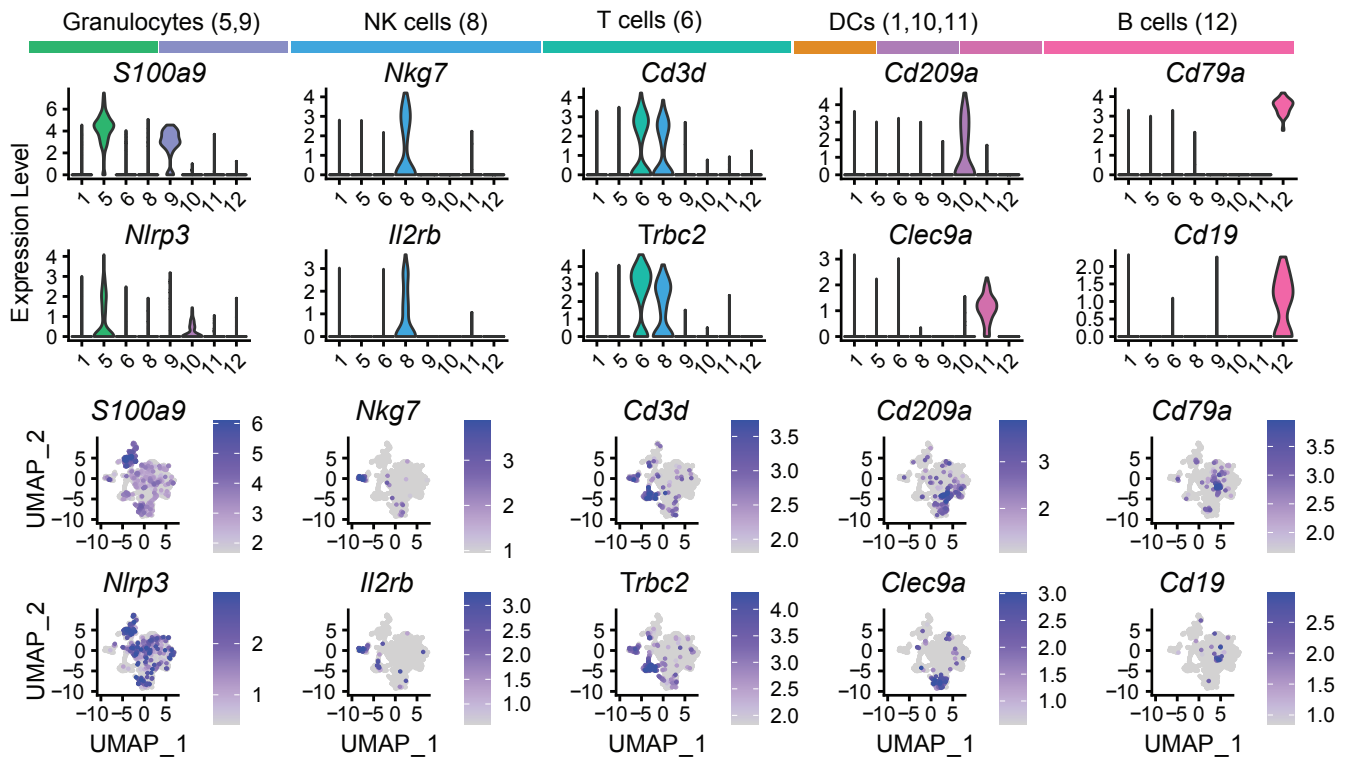

**Supplementary Figure 11**

**Single cell analysis of CD45+ immune cells in *Rank<sup>Cre</sup>Rosa26<sup>eYFP</sup>* mice in AngII-induced inflammation**

Violin and feature plots depicting specific marker genes of different leukocytes in the adventitia under AngII stimulation

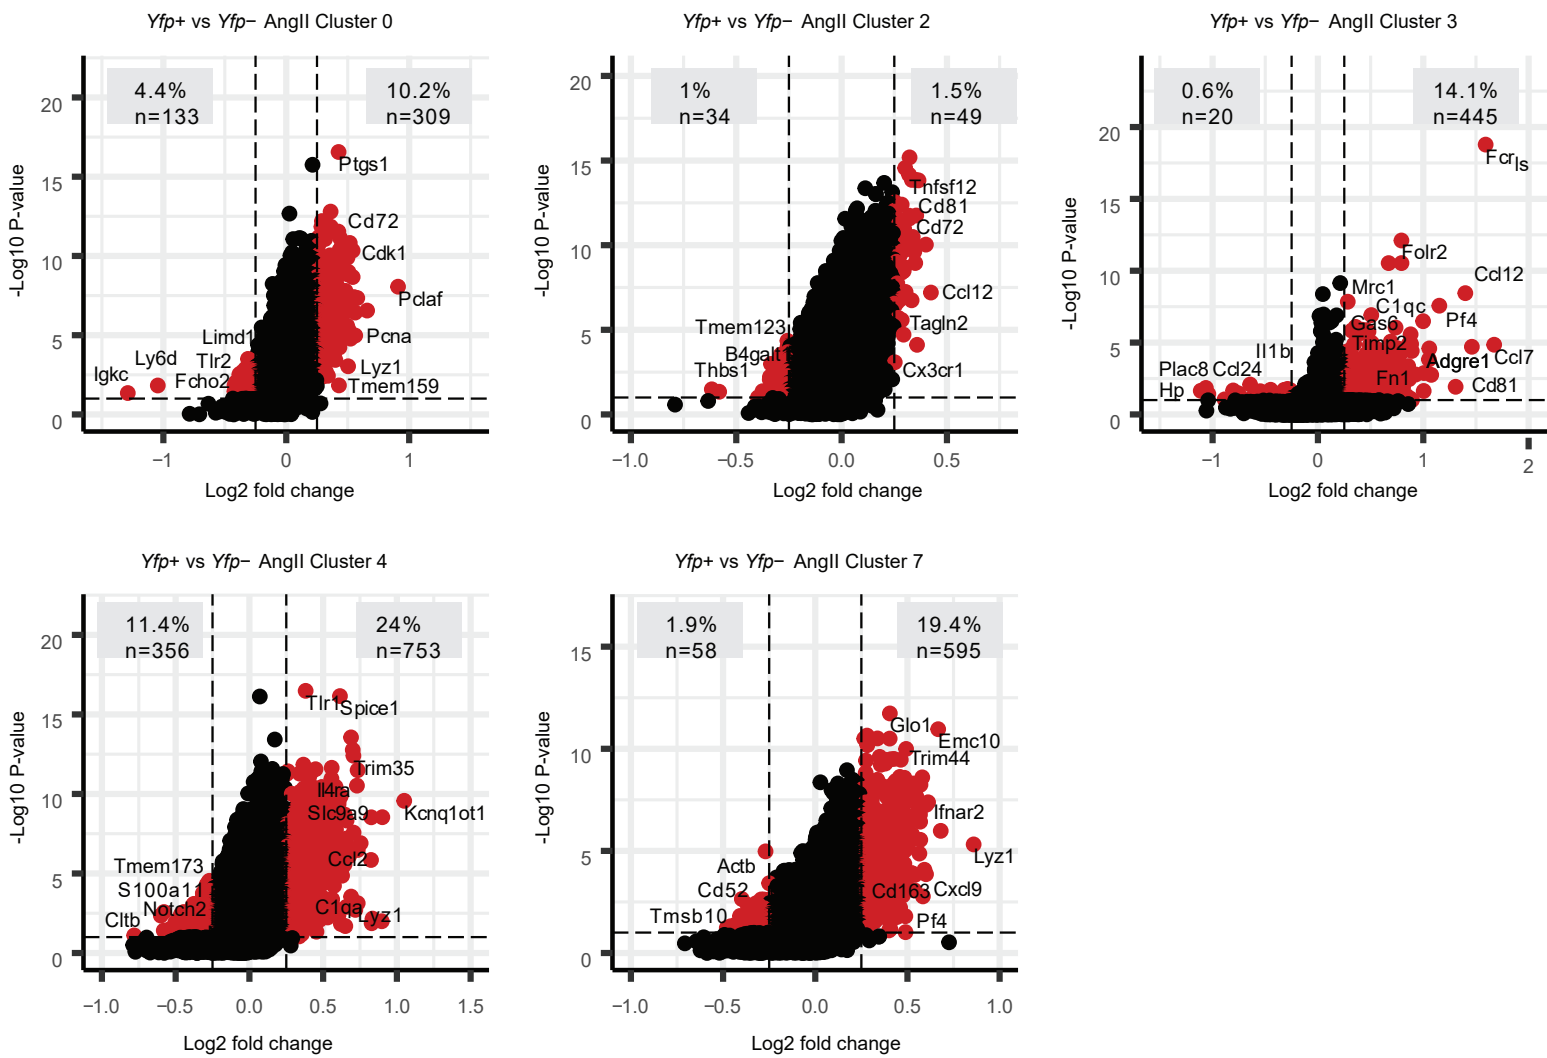

### Supplementary Figure 12

#### Differential gene expression of *Yfp+* and *Yfp-* macrophages in AngII inflammation

Volcano plots show statistical significance (P value) versus magnitude of change (fold change) of genes expressed by *Yfp+* and *Yfp-* macrophages in clusters 0,2,3,4,7. Differentially expressed genes ( $p < 0.05$ ), identified using Wilcoxon Rank Sum test, are indicated in red and their percentage and absolute number is given.

## Cluster-overlapping genes of *Yfp+* macrophages

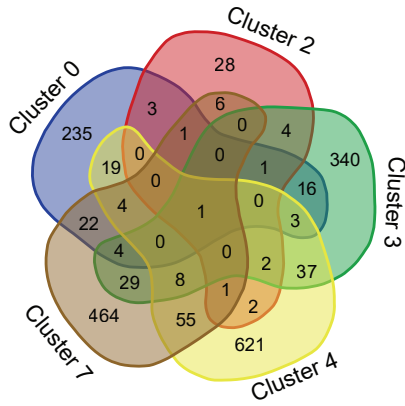

| Common between clusters:      | Number of common genes | Genes                                                                                                                                                                                                                                                                                                                                          |
|-------------------------------|------------------------|------------------------------------------------------------------------------------------------------------------------------------------------------------------------------------------------------------------------------------------------------------------------------------------------------------------------------------------------|
| All macrophages clusters      | 1                      | Ccl12                                                                                                                                                                                                                                                                                                                                          |
| Cluster 0 Cluster 2 Cluster 3 | 1                      | Cd81                                                                                                                                                                                                                                                                                                                                           |
| Cluster 0 Cluster 2 Cluster 7 | 1                      | Cx3cr1                                                                                                                                                                                                                                                                                                                                         |
| Cluster 0 Cluster 3 Cluster 4 | 3                      | C1qa C1qc Cmc1                                                                                                                                                                                                                                                                                                                                 |
| Cluster 0 Cluster 3 Cluster 7 | 4                      | Blvrb Fcrls Xpo1 Matr3                                                                                                                                                                                                                                                                                                                         |
| Cluster 0 Cluster 4 Cluster 7 | 4                      | Abhd12 Rfc1 Lyz1 Etfb                                                                                                                                                                                                                                                                                                                          |
| Cluster 2 Cluster 3 Cluster 4 | 2                      | Ncl Ltc4s                                                                                                                                                                                                                                                                                                                                      |
| Cluster 2 Cluster 4 Cluster 7 | 1                      | Lair1                                                                                                                                                                                                                                                                                                                                          |
| Cluster 3 Cluster 4 Cluster 7 | 8                      | Maf Cdk6 Pf4 Cemip2 Tmem165 Der12 Ccl2 Timm10                                                                                                                                                                                                                                                                                                  |
| Cluster 0 Cluster 2           | 3                      | Usp1 Mphosph8 Cd72                                                                                                                                                                                                                                                                                                                             |
| Cluster 0 Cluster 3           | 16                     | Ddx39 Lacc1 Nudc Leng1 Ntpr Brd3 Lsm7 Impdh1 Gcnt1 Tax1bp3 C1qb Vkorc1 Ntan1 Ccl4 Sarnp Anp32a                                                                                                                                                                                                                                                 |
| Cluster 0 Cluster 4           | 19                     | Sor11 Capns1 Senp6 Aif1 Atp5o.1 Stk38 Txncl15 Shtn1 Plk3 Wdr83os Polr1c Ptgs1 Efr3a Hacd2 Taz Efcab14 Mtif2 Acp5 Naip2                                                                                                                                                                                                                         |
| Cluster 0 Cluster 7           | 22                     | Nt5c2 Pcbp2 Srsf6 Epn1 Ccl3 Eif4g2 Smc6 Mif Acad8 Rab7 Frg1 Jak1 E2f4 Ndufa8 Chm Smc1a Mea1 Ube2s Sphk2 Bud23 Lamp1 Scmp                                                                                                                                                                                                                       |
| Cluster 2 Cluster 3           | 4                      | Ccl4 Ldha Slamf9 Casd1                                                                                                                                                                                                                                                                                                                         |
| Cluster 2 Cluster 4           | 2                      | Rwdd1 Bag1                                                                                                                                                                                                                                                                                                                                     |
| Cluster 2 Cluster 7           | 6                      | Dnajc13 Myo5a R3hdm4 P2ry6 Shrpd1 Jun                                                                                                                                                                                                                                                                                                          |
| Cluster 3 Cluster 4           | 37                     | Mtx1 Akt1 Ccl7 Degs1 Rxrb Tspan32 Eif2b4 C3ar1 Igfbp4 Msh3 2310009A05Rik Hopx 9530068E07Rik Mettl1 Mfap1a Sel1l Folr2 Swi5 Ago1 Ptpmt1 Adrb2 Vps29 Bcl2l13 Cenpb Tiparp Timp2 Gm8995 Surf4 Dnajc25 Rundc1 Kdm6a Trnfsf9 Srrt Adgre1 Sart3 Sept9 Rapgef1                                                                                        |
| Cluster 3 Cluster 7           | 29                     | Stard8 Itga6 Fam3a Mvb12b mt-Nd1 Smchd1 Elmo1 Smim10l1 Celn2 Nspe5 Kctd12 Wdr43 Cct3 Msmo1 mt-Nd2 Thyn1 Emc10 Trim8 Supt6 mt-Cytb Stab1 Pdk1 Gtf2i Dctn4 Mid1ip1 Vma21 Srf Safb2 Nfkbiz                                                                                                                                                        |
| Cluster 4 Cluster 7           | 55                     | Ep400 Supt4a Sdad1 Plscr3 Cpsf3 Ddx21 Rbm22 Atp2b1 Gbbp1 Dpm1 Parp8 Ms4a7 Pnn Commd8 Sertad3 Adam19 Pou2f2 Wsb1 Cnp Plk3ca Dnm2 Ube2h Kdm5a Rnf13 Rab28 Zadh2 Golgb1 Prxx Sec24a Rcor3 Gpr65 Parp14 Hs6st1 Vrk2 Hebp1 G3bp2 Trip12 Ssbp4 Pcf11 Ndufab1 Uqcrh Faim Acol2 Kctd10 Gapvd1 Ccr1 Zfp871 Psm4 Mir1 Smpd3b Fnbp11 Tgfb2 Gsap Madd Rin2 |

## Cluster-overlapping genes of *Yfp-* macrophages

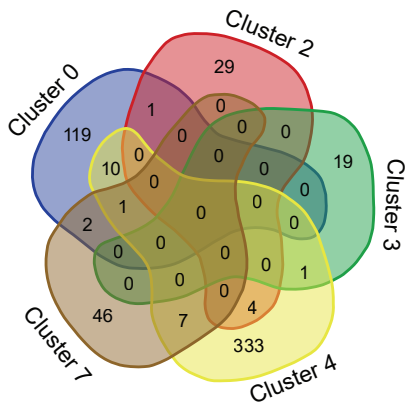

| Common between clusters:      | Number of common genes | Genes                                                             |
|-------------------------------|------------------------|-------------------------------------------------------------------|
| Cluster 0 Cluster 4 Cluster 7 | 1                      | Map2k3                                                            |
| Cluster 0 Cluster 2           | 1                      | Tmem123                                                           |
| Cluster 0 Cluster 4           | 10                     | Fam107b Paip2 Rbbp6 Ankrd17 Ash1l Reep3 Phf20l1 Osbp9 Crip1 Stat3 |
| Cluster 0 Cluster 7           | 2                      | BC031181 Cebpg                                                    |
| Cluster 2 Cluster 4           | 4                      | Zfp207 Rel Exoc5 Tomm5                                            |
| Cluster 3 Cluster 4           | 1                      | Fosl2                                                             |
| Cluster 4 Cluster 7           | 7                      | Dpm2 Tmsb10 Rad23a Al413582 Babam1 Bola3 Rp2                      |

### Supplementary Figure 13

#### Overlap of differentially expressed genes in *Yfp+* and *Yfp-* macrophages across clusters in AngII inflammation

Venn diagrams (left) indicate relation of clusters and the number of common genes between clusters. Tables (right) indicate gene names in overlapping clusters.

## Supplementary Table 1: Genotyping

### 1 FltCre (generic Cre-protocol)

|   |         |                            |
|---|---------|----------------------------|
| 1 | AllCreF | CGA TGC AAC GAG TGA TGA GG |
| 2 | AllCreR | CGC ATA ACC AGT GAA ACA GC |

### 2 cMyb

|   |           |                               |
|---|-----------|-------------------------------|
| 1 | Myb_WT5'  | CCA TGC GTC GCA AGG TGG AAC   |
| 2 | Myb_WT3'  | GTG CTT CGG CGA TGT GGT AA    |
| 3 | Myb_MUT3' | TGG CCG CTT TTC TGG ATT CAT C |

### 3 cMybflox

|   |        |                             |
|---|--------|-----------------------------|
| 1 | LoxP_1 | ATC TGA AGA AAA TGA ATT GA  |
| 2 | LoxP_2 | GCA TCA GCT CGA TGA TAA GCA |

### 4 Mx1-Cre

|   |       |                               |
|---|-------|-------------------------------|
| 1 | 30250 | GTG AGT TTC GTT TCT GAG CTC C |
| 2 | 14314 | CGG TTA TTC AAC TTG CAC CA    |

### 5 Csf1r-MerCreMer

|   |               |                         |
|---|---------------|-------------------------|
| 1 | CFMS Promoter | TCA TTC CAG AAC CAG AGC |
| 2 | MER Reverse   | GAT CGT GTT GGG GAA GCC |

### 6 Tie2-MerCreMer

|   |       |                                    |
|---|-------|------------------------------------|
| 1 | WT5'  | CAT CGC ATA CCA TAC ATA GGT GGA GG |
| 2 | MUT3' | AAT CAA GGG TCC CCA AAC TCA C      |
| 3 | WT3'  | GAG GCA GCA TCT GTC TAC AAG AGATGG |

### 7 c-Kit-MerCreMer (generic Cre)

|   |       |                             |
|---|-------|-----------------------------|
| 1 | Cre-F | GGC GTT TTC TGA GCA TAC CT  |
| 2 | Cre-R | CTA CAC CAG AGA CGG AAA TCC |

### 8 Rank-Cre (Waskow)

|   |                     |                               |
|---|---------------------|-------------------------------|
| 1 | Rank-Cre Waskow fw  | AAC CTG AGG ATG TGA GGG ACT A |
| 2 | Rank-Cre Waskow rev | GTC AAA GTC AGT GCG TTC AAA G |

### 9 Rosa26-mT/mG

|   |          |                             |
|---|----------|-----------------------------|
| 1 | oIMR7318 | CTC TGC TGC CTC CTG GCT TCT |
| 2 | oIMR7319 | CGA GGC GGA TCA CAA GCA ATA |
| 3 | oIMR7320 | TCA ATG GGC GGG GGT CGT T   |

### 10 Rosa26-eYFP

|   |          |                              |
|---|----------|------------------------------|
| 1 | oIMR4982 | AAG ACC GCG AAG AGT TTG TC   |
| 2 | oIMR8545 | AAA GTC GCT CTG AGT TGT TATC |
| 3 | oIMR8546 | GGA GCG GGA GAA ATG GAT ATG  |

### 11 Rosa26-eGFP

|   |         |                               |
|---|---------|-------------------------------|
| 1 | PGKpA-F | GAT CAG CAG CCT CTG TTC CACA  |
| 2 | EGFP-5R | CGC TGA ACT TGT GGC CGT TTA C |



**Supplementary Table 2: Antibody List**

| Antibody                       | Dilution | Clone              | Fluorescence    | Company         | Catalog number |
|--------------------------------|----------|--------------------|-----------------|-----------------|----------------|
| <b>Flow Cytometry</b>          |          |                    |                 |                 |                |
| F4/80                          | 1:50     | BM8                | APC             | eBioscience     | 17-4801-82     |
| CD 48                          | 1:100    | HM 48-1            | PE              | eBioscience     | 12-0481-82     |
| CD115                          | 1:100    | AFS98              | BV421           | Biolegend       | 135513         |
| CD117                          | 1:100    | ACK-2              | AF700           | eBioscience     | 56117282       |
| CD11b                          | 1:100    | M1/70              | PE-Cy7          | BD Biosciences  | 552850         |
| CD11b                          | 1:100    | M1/70.15           | bio             | Invitrogen      | 13-0112-82     |
| CD11b                          | 1:100    | M1/70              | PeCy7           | eBio            | 25-0112-82     |
| CD11c                          | 1:100    | N418               | PE              | Biolegend       | 561044         |
| CD11c                          | 1:100    | N418               | PerCP-Cy5.5     | eBio            | 45-0114-82     |
| CD150                          | 1:100    | TC15-12F12.2       | BV605           | BioLegend       | 115903         |
| CD16/CD32 (FcγRIII/FcγRII)     | 1:50     | 2.4G2              | uncoupled       | BD Biosciences  | 553142         |
| CD64                           | 1:100    | X54-5/7.1          | APC             | Biolegend       | 139306         |
| CD3e                           | 1:100    | 145-2C11           | bio             | eBio            | 13-0031-82     |
| CD4                            | 1:100    | GK1.5              | bio             | Ph              | 553728         |
| CD45                           | 1:100    | cl.30-F11          | eF780 = APCCy7  | eBioscience     | 47-0451-82     |
| CD45.1                         | 1:100    | A20                | Fitc            | BD Biosciences  | 110706         |
| CD45.2                         | 1:100    | 104                | APC-Cy7         | BD Biosciences  | 560694         |
| CD68                           | 1:200    | FA11               | uncoupled       | BioRad          | MCA1957        |
| CD8a                           | 1:100    | 53-6.7             | bio             | eBio            | 13-0081-82     |
| F4/80                          | 1:100    | BM8                | BV421           | Biolegend       | 123131         |
| Gr-1                           | 1:100    | RB6-8C5            | bio             | eBio            | 13-5931-82     |
| Ly6G                           | 1:100    | 1A8                | PE              | Biolegend       | 127608         |
| NK1.1                          | 1:100    | PK136              | PE              | Biolegend       | 108708         |
| SA                             | 1:100    |                    | APC Cy7         | Ph              | 554063         |
| Sca-1                          | 1:100    | D7                 | PerCP-Cy5.5     | eBioscience     | 45-5981-82     |
| Siglec-F                       | 1:100    | E50-2440           | PE              | BD Biosciences  | 552126         |
| TCR-β                          | 1:100    | 1B3.3              | PE              | Biolegend       | 109208         |
| Ter119                         | 1:100    | Ter119             | PE              | Biolegend       | 116208         |
| Ter119                         | 1:100    | Ter119             | PE              | eBio            | 12592182       |
| <b>Immunohistology</b>         |          |                    |                 |                 |                |
| anti-GFP                       | 1:100    | Polyclonal, Rabbit | uncoupled       | Invitrogen      | A-11122        |
| anti-GFP                       | 1:100    | Polyclonal, Goat   | uncoupled       | abcam           | Ab6673         |
| CD45.2                         | 1:50     | 104                | uncoupled       | Merck Millipore | MABF441        |
| F4/80                          | 1:50     | BM8                | uncoupled       | Invitrogen      | 14-4801-85     |
| CD68                           | 1:200    | FA11               | uncoupled       | BioRad          | MCA1957        |
| Goat IgG                       | 1:100    | Polyclonal, Goat   | uncoupled       | Santa Cruz      | Sc-2028        |
| Isotype IgG2a, κ               | 1:50     | eBR2a              | uncoupled       | Invitrogen      | 14-4321-82     |
| Isotype IgG2a, κ               | 1:50     | MOPC-173           | uncoupled       | BioLegend       | 400201         |
| Rabbit Immunoglobulin Fraction | 1:100    | Polyclonal, Rabbit | uncoupled       | Dako            | X0936          |
| AF350 goat anti-rabbit         | 1:200    | Polyclonal         | Alexa Fluor 350 | Invitrogen      | A-11046        |
| AF488 donkey anti-goat         | 1:200    | Polyclonal         | Alexa Fluor 488 | Invitrogen      | A-11055        |
| AF488 goat anti-mouse          | 1:200    | Polyclonal         | Alexa Fluor 488 | Invitrogen      | A-11001        |



|                                        |                                     |            |                 |                        |             |
|----------------------------------------|-------------------------------------|------------|-----------------|------------------------|-------------|
| <b>AF488 goat anti-rabbit</b>          | 1:200                               | Polyclonal | Alexa Fluor 488 | Invitrogen             | A-11034     |
| <b>AF594 goat anti-rabbit</b>          | 1:200                               | Polyclonal | Alexa Fluor 594 | Invitrogen             | A-11037     |
| <b>AF647 goat anti-rabbit</b>          | 1:200                               | Polyclonal | Alexa Fluor 647 | Invitrogen             | A-21244     |
| <b>Cy3 goat anti-rat</b>               | 1:200                               | Polyclonal | Cy3             | Jackson Immunoresearch | 112-165-003 |
| <b>Cy5 goat anti-rabbit</b>            | 1:200                               | Polyclonal | Cy5             | Jackson Immunoresearch | 111-175-144 |
| <b>Cy5 goat anti-rat</b>               | 1:150                               | Polyclonal | Cy5             | Jackson Immunoresearch | 112-175-143 |
| <b>Click-iT™ EdU proliferation kit</b> | According to manufacturers protocol |            | Alexa Fluor 594 | Thermofisher           | C10339      |
