# Supplementary material for: Ontogeny of arterial macrophages defines their functions in homeostasis and inflammation
Source: PubMed Central journal article supplement (PMC7486394; doi:10.1038/s41467-020-18287-x), 2020-09-11
Supplement: 41467_2020_18287_MOESM4_ESM.pdf [file 41467_2020_18287_MOESM4_ESM.pdf]

## Description of Supplementary Files

**File Name: Supplementary Data 1**

**Description:**

**Sheet 1:** Cell type specific markers in Seurat-based clustering of adventitial immune cells in steady state

**Sheet 2:** Cell type specific markers in Seurat-based clustering of adventitial immune cells in AngII induced inflammation

**Sheet 3:** Differentially expressed genes (*eYfp+* vs. *eYfp-* cells) in steady state

**Sheet 4:** Differentially expressed genes (*eYfp+* vs. *eYfp-* cells) in AngII induced inflammation
